# Supplementary material for: Evaluation of the Biological Potential of Himanthalia elongata (L.) S.F.Gray and Eisenia bicyclis (Kjellman) Setchell Subcritical Water Extracts
Source: MDPI journal article supplement (doi:10.3390/foods11050746), 2022-03-03
Supplement: s1 [file s1]

## Supplementary material

**Table S1.** Chemical names, molecular formulas, CAS numbers, and molecular weight of the studied pollutants.

| Pesticides and Pharmaceuticals        | Analyte                                                                   | Molecular Formula                                                 | CAS number                       | Molecular Weight (g/mol) |
|---------------------------------------|---------------------------------------------------------------------------|-------------------------------------------------------------------|----------------------------------|--------------------------|
| Organochlorine pesticides             | $\alpha$ -, $\beta$ -, $\gamma$ -, $\delta$ -hexachlorocyclohexanes (HCH) | C <sub>6</sub> H <sub>6</sub> Cl <sub>6</sub>                     | 319-84-6<br>319-85-7<br>319-86-8 | 290.8                    |
|                                       | Hexachlorobenzene (HCB)                                                   | C <sub>6</sub> Cl <sub>6</sub>                                    | 118-74-1                         | 284.8                    |
|                                       | 1-Chloro-2-[2,2,2-trichloro-1-(4-chlorophenyl)ethyl]benzene (o,p'-DDT)    | C <sub>14</sub> H <sub>9</sub> Cl <sub>5</sub>                    | 50-29-3                          | 354.5                    |
|                                       | [2,2bis(p-chlorophenyl)-1,1-dichloroethylene] (p,p'-DDE)                  | C <sub>14</sub> H <sub>8</sub> Cl <sub>4</sub>                    | 72-55-9                          | 318.0                    |
|                                       | Tetrachlorodiphenylethane (p,p'-DDD)                                      | C <sub>14</sub> H <sub>10</sub> Cl <sub>4</sub>                   | 72-54-8                          | 320.0                    |
|                                       | Aldrin                                                                    | C <sub>12</sub> H <sub>8</sub> Cl <sub>6</sub>                    | 309-00-2                         | 364.9                    |
|                                       | Dieldrin                                                                  | C <sub>12</sub> H <sub>8</sub> Cl <sub>6</sub> O                  | 60-57-1                          | 380.9                    |
|                                       | Endrin                                                                    | C <sub>12</sub> H <sub>8</sub> Cl <sub>6</sub> O                  | 72-20-8                          | 380.9                    |
|                                       | $\alpha$ , $\beta$ -Endosulfan                                            | C <sub>9</sub> H <sub>6</sub> Cl <sub>6</sub> O <sub>3</sub> S    | 959-98-8<br>33213-65-9           | 406.9                    |
|                                       | Methoxychlor                                                              | C <sub>16</sub> H <sub>15</sub> Cl <sub>3</sub> O <sub>2</sub>    | 72-43-5                          | 345.6                    |
| Organophosphorus pesticides           | Dimethoate                                                                | C <sub>5</sub> H <sub>12</sub> NO <sub>3</sub> PS <sub>2</sub>    | 60-51-5                          | 229.3                    |
|                                       | Diazinon                                                                  | C <sub>12</sub> H <sub>21</sub> N <sub>2</sub> O <sub>3</sub> PS  | 333-41-5                         | 304.35                   |
|                                       | Chlorpyrifos-methyl                                                       | C <sub>7</sub> H <sub>7</sub> Cl <sub>3</sub> NO <sub>3</sub> PS  | 5598-13-0                        | 322.5                    |
|                                       | Parathion-methyl                                                          | C <sub>8</sub> H <sub>10</sub> NO <sub>3</sub> PS                 | 298-00-0                         | 263.21                   |
|                                       | Malathion                                                                 | C <sub>10</sub> H <sub>19</sub> O <sub>6</sub> PS <sub>2</sub>    | 121-75-5                         | 330.4                    |
|                                       | Chlorpyrifos                                                              | C <sub>9</sub> H <sub>11</sub> Cl <sub>3</sub> NO <sub>3</sub> PS | 2921-88-2                        | 350.6                    |
|                                       | Chlorfenvinphos                                                           | C <sub>12</sub> H <sub>14</sub> Cl <sub>3</sub> O <sub>4</sub> P  | 470-90-6                         | 359.6                    |
| Psychiatric drugs and its metabolites | Carbamazepine                                                             | C <sub>15</sub> H <sub>12</sub> N <sub>2</sub> O                  | 298-46-4                         | 236.27                   |
|                                       | Citalopram                                                                | C <sub>20</sub> H <sub>21</sub> FN <sub>2</sub> O                 | 59729-33-8                       | 324.40                   |
|                                       | Diazepam                                                                  | C <sub>16</sub> H <sub>13</sub> ClN <sub>2</sub> O                | 439-14-5                         | 284.74                   |
|                                       | Fluoxetine hydrochloride                                                  | C <sub>17</sub> H <sub>19</sub> ClF <sub>3</sub> NO               | 56296-78-7                       | 345.79                   |
|                                       | Paroxetine hydrochloride                                                  | C <sub>19</sub> H <sub>21</sub> ClFNO <sub>3</sub>                | 78246-49-8                       | 365.83                   |
|                                       | Sertraline hydrochloride                                                  | C <sub>17</sub> H <sub>18</sub> Cl <sub>3</sub> N                 | 79559-97-0                       | 342.69                   |
|                                       | Trazodone hydrochloride                                                   | C <sub>19</sub> H <sub>23</sub> Cl <sub>2</sub> N <sub>5</sub> O  | 19666-36-5                       | 408.33                   |
|                                       | Venlafaxine hydrochloride                                                 | C <sub>17</sub> H <sub>28</sub> ClNO <sub>2</sub>                 | 99300-78-4                       | 313.87                   |

|                                                              |                                                            |                                              |               |        |
|--------------------------------------------------------------|------------------------------------------------------------|----------------------------------------------|---------------|--------|
| Pharmaceuticals used in Alzheimer's and Parkinson's diseases | Citalopram N-oxide hydrochloride (Citalopram metabolite)   | $C_{20}H_{22}ClFN_2O_2$                      | 62498-71-9    | 376.86 |
|                                                              | Citalopram propionic acid (Citalopram metabolite)          | $C_{18}H_{14}FNO_3$                          | Not Available | 311.31 |
|                                                              | Demethylcitalopram hydrochloride (Citalopram metabolite)   | $C_{19}H_{20}ClFN_2O$                        | 97743-99-2    | 346.83 |
|                                                              | Didemethylcitalopram hydrochloride (Citalopram metabolite) | $C_{18}H_{18}ClFN_2O$                        | 1189694-81-2  | 332.80 |
|                                                              | O-Desmethylvenlafaxine (Venlafaxine metabolite)            | $C_{16}H_{25}NO_2$                           | 93413-62-8    | 263.38 |
|                                                              | 10,11-Epoxy carbamazepine (Carbamazepine metabolite)       | $C_{15}H_{12}N_2O_2$                         | 36507-30-9    | 252.27 |
|                                                              | Norfluoxetine hydrochloride (Fluoxetine metabolite)        | $C_{16}H_{17}ClF_3NO$                        | 57226-68-3    | 331.76 |
|                                                              | Norsertaline hydrochloride (Sertraline metabolite)         | $C_{16}H_{16}Cl_3N$                          | 675126-08-6   | 328.66 |
|                                                              | Amantadine hydrochloride                                   | $C_{10}H_{17}N HCl$                          | 665-66-7      | 187.71 |
|                                                              | Apomorphine hydrochloride                                  | $C_{17}H_{17}NO_2 HCl \cdot \frac{1}{2}H_2O$ | 41372-20-7    | 312.79 |
|                                                              | Benserazide hydrochloride                                  | $C_{10}H_{15}N_3O_5 HCl$                     | 14919-77-8    | 293.70 |
|                                                              | Carbidopa                                                  | $C_{10}H_{14}N_2O_4 H_2O$                    | 38821-49-7    | 244.24 |
|                                                              | Entacapone                                                 | $C_{14}H_{15}N_3O_5$                         | 130929-57-6   | 305.29 |
|                                                              | R(-)-Deprenyl hydrochloride (Selegiline hydrochloride)     | $C_{13}H_{17}N HCl$                          | 14611-52-0    | 223.74 |
|                                                              | Donepezil hydrochloride                                    | $C_{24}H_{29}NO_3 HCl$                       | 120011-70-3   | 415.95 |
|                                                              | Galanthamine hydrochloride                                 | $C_{17}H_{21}NO_3 HBr$                       | 1953-04-4     | 368.27 |
|                                                              | Pramipexole dihydrochloride monohydrate                    | $C_{10}H_{17}N_3S \cdot 2HCl \cdot H_2O$     | 191217-81-9   | 302.26 |
|                                                              | Safinamide mesylate salt                                   | $C_{17}H_{19}FN_2O_2 \cdot xCH_4O_3S$        | 202825-46-5   | 302.34 |
|                                                              | Rasagiline mesylate                                        | $C_{12}H_{13}N \cdot CH_4O_3S$               | 161735-79-1   | 267.34 |
|                                                              | Rivastigmine hydrogen tartrate                             | $C_{14}H_{22}N_2O_2 \cdot C_4H_6O_6$         | 129101-54-8   | 400.42 |
|                                                              | Ropinirole hydrochloride                                   | $C_{16}H_{24}N_2O HCl$                       | 91374-20-8    | 296.84 |
|                                                              | Rotigotine hydrochloride                                   | $C_{19}H_{25}NOS \cdot HCl$                  | 125572-93-2   | 351.93 |
